# Supplementary material for: First example of biopolymer–polyoxometalate complex coacervation in gelatin–decavanadate mixtures
Source: Royal Society of Chemistry journal article supplement (doi:10.1039/b719216a), 2008-01-01
Supplement: b719216a.pdf [file b719216a.pdf]

## Supporting Information

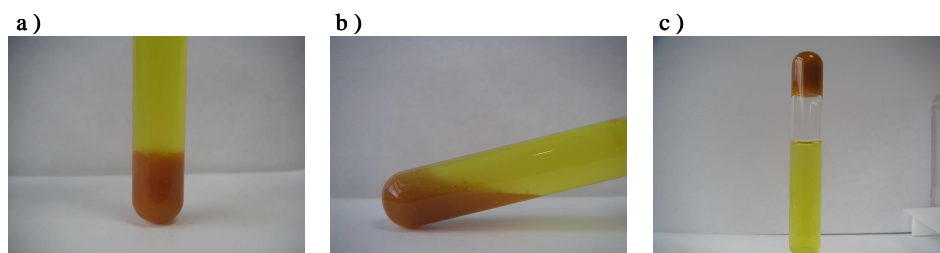

**Fig. 1** Photographs of the same sample prepared at 40°C and pH 3.4 with [gelatin] = 8 wt.% / [vanadates] = 120 mM: a) and b) just after preparation at 40°C ; c) after 3 h at 20°C.

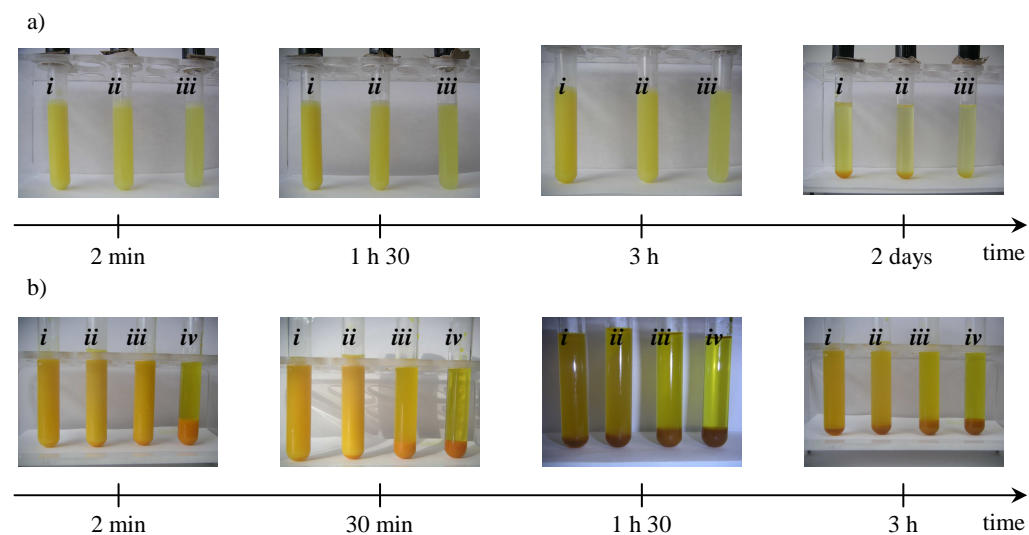

**Fig. 2** Photographs taken upon ageing conditions without stirring ( $T = 40^{\circ}\text{C}$ , pH 3.4) with gelatin in: a) dilute regime (*i.*  $c = 1$  wt.%, *ii.*  $c = 0.5$  wt.%, *iii.*  $c = 0.2$  wt.%) and different vanadate concentrations: *i.*  $c = 5$  mM, *ii.*  $c = 3.5$  mM, *iii.*  $c = 2.5$  mM ; b) semi-dilute regime ( $c = 8$  wt.%) and different vanadate concentrations: *i.*  $c = 50$  mM, *ii.*  $c = 60$  mM, *iii.*  $c = 70$  mM, *iv.*  $c = 75$  mM.

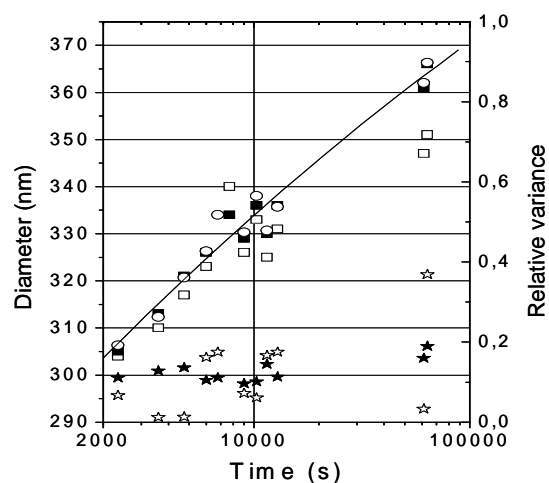

**Fig 3.** Evolution of colloids size as measured by DLS upon ageing conditions without stirring ( $T = 40^{\circ}\text{C}$ ,  $\text{pH } 3.4$ ) for  $[G] = 0.5 \text{ wt.}\%$  and  $[V] = 3.5 \text{ mM}$ . The correlation function have been fitted by different methods: Cumulant Quartic ( $\square$ ), Cumulant Quadratic ( $\blacksquare$ ) and NNLS ( $\circ$ ). The stars represent respectively the relative variance associated to the quadratic data (full symbols) and the relative variance associated with NNLS data (open symbols). The continuous line corresponds to a second order polynomial fit of the Cumulant quadratic data and should be used as a guide for the eyes.

## Supporting Information

### Experimental

**Materials.** Gelatin,  $\text{NaVO}_3$ , HCl, and NaCl were purchased from Sigma-Aldrich in their reagent grade and used without further purification. Deionized water obtained with a MilliQ system (Millipore) was used as solvent in all the experiments.

- *Preparation of vanadate solutions.* Polyoxovanadate solutions have been prepared by acidification of an aqueous solution of sodium metavanadate  $\text{NaVO}_3$  (Sigma, >99%, 0.1 mol.L<sup>-1</sup>, pH = 8) with an aqueous HCl solution (2N). Once the polyoxovanadate solution is prepared with the desired temperature and pH, this solution is added to an aqueous gelatin solution.

- *Preparation of Gelatin solutions.* Gelatin extracted from porcine skin (type A with pI close to 8 and a bloom of ~175 g corresponding to an average molecular weight of ~40000 g/mol according to Sigma-Aldrich). Gelatin solutions were prepared by swelling the gelatin granules in an aqueous solution during a minimum of 3 h at 5 °C. Gelatin was then dissolved at 40 °C using a magnetic stirrer for 30 min at 300 rpm. When gelatin is dissolved, the pH and ionic strength are adjusted with respectively an aqueous HCl solution (2N) and NaCl.

- *Preparation of mixtures.* Mixtures were prepared by slowly adding dilute vanadate solutions in gelatin solutions under stirring ( $v = 300$  rpm). The final solutions were stirred during 2 min prior to any observations. In fact, we have checked that when turbid samples are still present after 2 min of stirring, further stirring periods lead to macroscopic phase separation and never to redissolution. After these initial observations, the samples are aged in an oven at 40°C.

**Methods.** <sup>51</sup>V liquid NMR spectroscopy. <sup>51</sup>V liquid NMR spectra were recorded at 78.9 MHz on a Bruker Avance 300 spectrometer. The chemical shifts were referenced to  $\text{VOCl}_3$  ( $\delta = 0$  ppm). A spectral width of 31 kHz, a pulse width of 16  $\mu\text{s}$ , with an accumulation time of 0.25 s and no relaxation delay, were used. An accumulation of 1000 transients was usually performed on each sample. The 10 mm NMR tubes were filled with 4 ml of vanadate / gelatin solutions.

**Dynamical light scattering (DLS).** Dynamical light scattering was performed on a Brookhaven spectrometer (BI-9000AT autocorrelator). The autocorrelation functions were recorded at  $\theta = 90^\circ\text{C}$  and analyzed by the Cumulants technique for the determination of the diffusion constant  $D(c)$ . From the extrapolation of the quadratic diffusion coefficient to infinite dilution, the hydrodynamic radius ( $R_H$ ) of the colloids was determined through the

Stokes-Einstein relation,  $R_H = k_B T / 6\pi\eta_S D_{(c \rightarrow 0)}$ , where  $k_B$  is the Boltzmann constant,  $T$  the temperature ( $T = 338\text{ K}$ ) and  $\eta_S$  the solvent viscosity at 338 K.
